# Supplementary material for: Thin films of topological Kondo insulator candidate SmB6: Strong spin-orbit torque without exclusive surface conduction
Source: PubMed Central journal article supplement — Sci Adv. 2018 Jan 19;4(1):eaap8294. doi: 10.1126/sciadv.aap8294 (PMC5777401; doi:10.1126/sciadv.aap8294), 2018-01-19
Supplement: aap8294_SM.pdf [file aap8294_SM.pdf]

## Supplementary Materials for

### **Thin films of topological Kondo insulator candidate SmB<sub>6</sub>: Strong spin-orbit torque without exclusive surface conduction**

Yufan Li, Qinli Ma, S. X. Huang, C. L. Chien

Published 19 January 2018, *Sci. Adv.* **4**, eaap8294 (2018)

DOI: 10.1126/sciadv.aap8294

#### **This PDF file includes:**

- section S1. Comparison of the transport properties of SmB<sub>6</sub> thin films and single-crystal bulk specimens
- section S2. Magnetoresistance and Hall effect
- section S3. Additional data on crystalline and chemical stoichiometry characterizations
- section S4. SOT-induced switching of perpendicularly magnetized CoFeB
- section S5. Current distribution in multilayer thin films
- fig. S1. Resistance ratio as a function of sample thicknesses.
- fig. S2. Magnetoresistance of SmB<sub>6</sub> thin films.
- fig. S3. Hall resistance of SmB<sub>6</sub> thin films.
- fig. S4. Additional XRD data of SmB<sub>6</sub> thin films.
- fig. S5. XPS spectrum of SmB<sub>6</sub> thin films.
- fig. S6. Additional SOT switching results of various temperatures.
- fig. S7. A schematic diagram of the anomalous Hall voltage measurement under the presence of a nonmagnetic shunting layer.
- fig. S8. Temperature dependence of resistance of SmB<sub>6</sub> and CoFeB/W multilayers.
- fig. S9. Sheet resistance of CoFeB/W multilayer as a function of W thicknesses.
- References (43, 44)

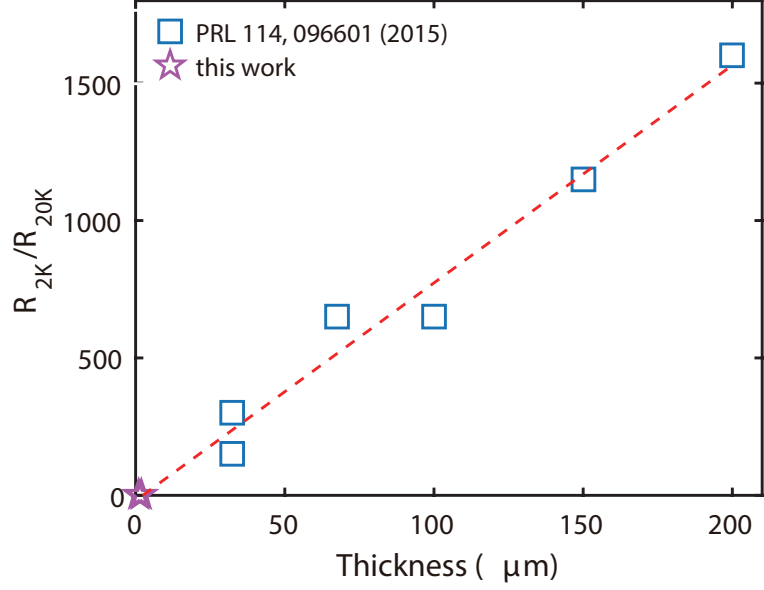

fig. S1. Resistance ratio  $R_{2K}/R_{20K}$  as a function of sample thicknesses. The blue squares are reproduced from PRL 114, 096601 (2015) [35]. The red dashed line is the linear fitting to the blue squares. The pink pentagram represents the result from this work.

### section S1. Comparison of the transport properties of $\text{SmB}_6$ thin films and single-crystal bulk specimens

In the manuscript we demonstrated experimental observations in thin films that are in apparent contradiction to the 2D transport features concluded by studies using bulk specimens. An intriguing question that follows is whether any convergence can be found in the transport properties between thin film samples and single-crystal bulk specimens. One major difference between the bulk samples and the thin film samples is that in bulk specimen the resistance changes by  $10^3 \sim 10^5$  times from room temperature down to below 10 K, whereas in thin films it only changes by about 30 %. However, we note that Syers *et al.* [35] studied single-crystal bulk samples with thicknesses ranged from 200  $\mu\text{m}$  to 32.5  $\mu\text{m}$ . Even at these macroscopic thicknesses, the ratio  $R_{2K}/R_{20K}$  decreases rapidly from 1600 for 200  $\mu\text{m}$ -thick sample to 200  $\sim$  300 for 32.5  $\mu\text{m}$ -thick sample. In fig. S1, we plot the  $R_{2K}/R_{20K}$  values obtained from their bulk single crystals together with the  $R_{2K}/R_{20K}$  values of our thin films (1.06  $\sim$  1.07 for all thicknesses). Very interestingly, the  $R_{2K}/R_{20K}$  values of our thin films are consistent with those of the bulk crystals that decrease linearly with reduced thickness.

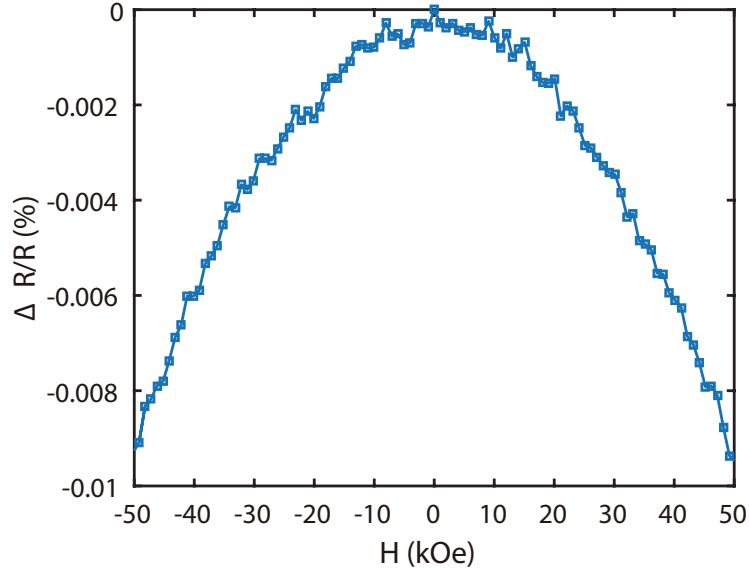

fig. S2. Magnetoresistance of  $\text{SmB}_6$  thin films. The longitudinal magnetoresistance of the 250 nm-thick film obtained at 1.8 K.

In the manuscript we also show that the activation energy of the thin films is consistent with the reported values in bulk samples. This implies that the hybridization gap in the thin films is the same as the bulk materials. These are evidences that the transport properties of thin-film samples and single-crystal samples may converge when they have similar thicknesses.

## section S2. Magneto-resistance and Hall effect

The  $\text{SmB}_6$  thin films display a negative magneto-resistance (MR) at 2 K, in agreement with bulk specimen [43]. A representative MR curve is shown in fig. S2, obtained from a 250 nm-thick film.

In fig. S3, we show the Hall resistance versus field curves for 3 representative film thicknesses at 3 characteristic temperatures. Evidently, all the field dependences ( $R_{yx}$  vs.  $H$ ) are very linear, with only small deviations from linear fitting, presumably due to possible multi-type carriers. We found our Hall effect results in qualitative agreement with that reported in sputtered polycrystalline  $\text{SmB}_x$  films [44].

## section S3. Additional data on crystalline and chemical stoichiometry characterizations

In fig. S4, we show the XRD patterns for our films samples with the thicknesses ranging from 50 nm to 500 nm. The FWHM of thicker films (250 nm and 500 nm) is about  $0.8^\circ$ , while broader for thinner films (50 nm and 100 nm) at around  $1.4^\circ$ . This is expected due to

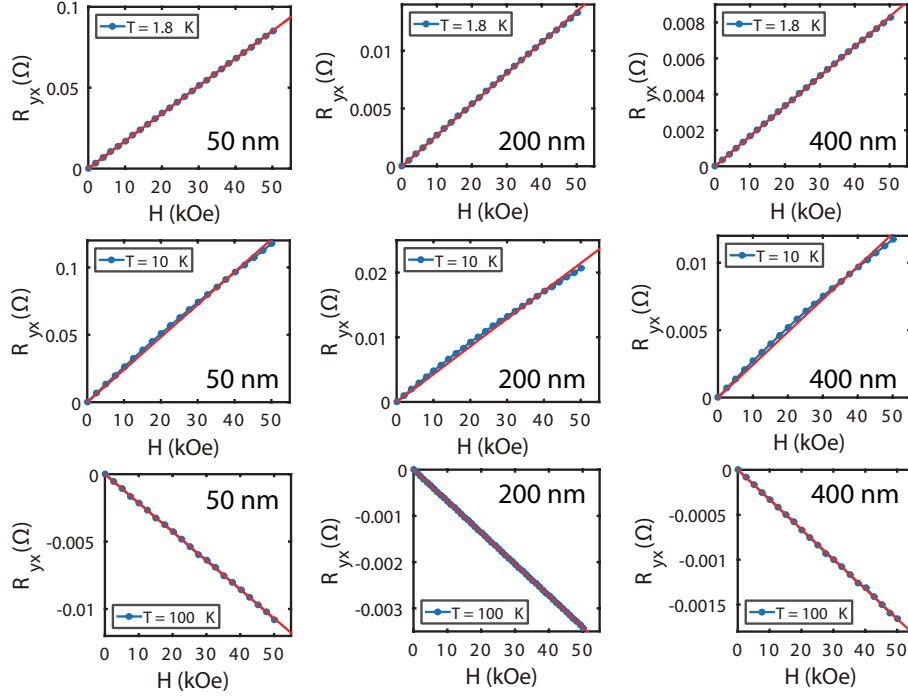

fig. S3. Hall resistance of  $\text{SmB}_6$  thin films. Hall resistance as a function of magnetic field for 50 nm, 200 nm, 400 nm thick films measured at 1.8 K, 10 K, 100 K respectively.

smaller thickness. For all films, the surface is composed of only the  $\text{SmB}_6$  (100) plane; no other phases are observed. This is the crystal plane on which the topological surface state (TSS) is proposed to reside. Therefore our samples should be able to evidence the TSS, should it be present.

X-ray photoelectron spectroscopy (XPS) was employed to verify the stoichiometry of  $\text{SmB}_6$ . A full spectrum is shown in fig. S5. The carbon and oxygen peaks are due to the absorption from exposure to the air, and can be removed or suppressed after slight  $\text{Ar}^+$  bombardment at the surface. Fine scans were performed to Sm  $3d^5$  and B  $1s$  peaks, carried out on a 500 nm-thick thin film and a polycrystalline bulk specimen cut from stoichiometric target, while the latter is used for calibrating the measured chemical composition. We obtain the atomic ratio  $r_{B:Sm}$  for our sputtered thin film as  $5.90 \pm 0.11$ .

#### section S4. SOT-induced switching of perpendicularly magnetized CoFeB

In fig. S6, more experimental data of the SOT-induced switching on  $\text{CoFeB}(1)/\text{W}(0.8)/\text{SmB}_6(t)$  samples were provided. All switching curves were measured under the same external in-plane field of 200 Oe, parallel or anti-parallel to the current direction. The film thickness of  $\text{SmB}_6$  and the temperature at which the measurements were carried out are denoted on the

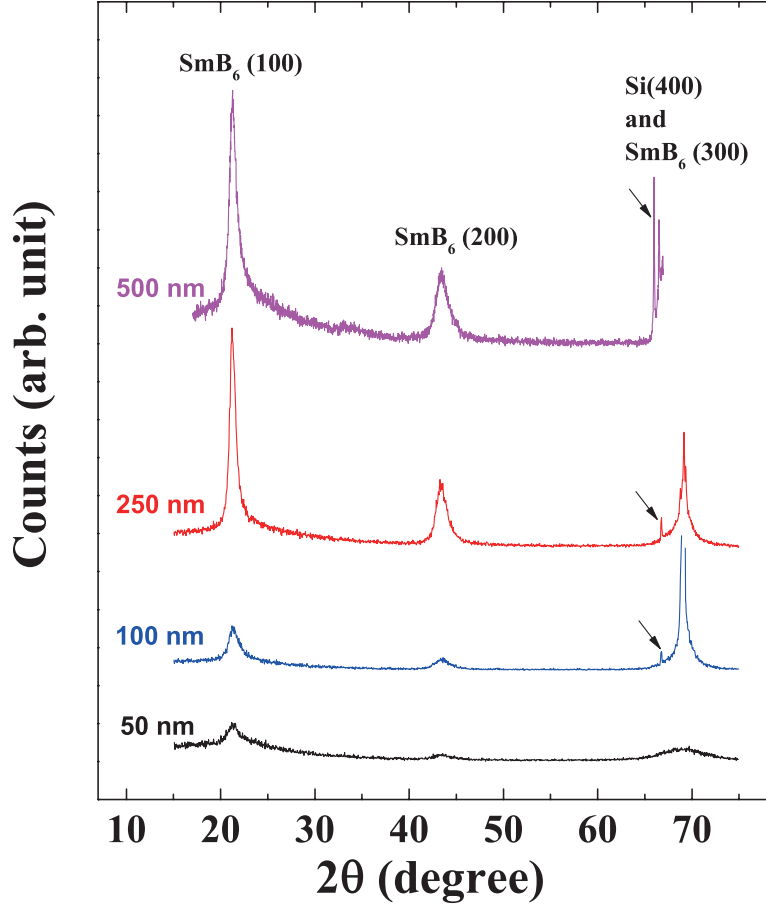

fig. S4. Additional XRD data of SmB<sub>6</sub> thin films. XRD scan of the SmB<sub>6</sub> / Si(001) thin films with various film thicknesses. Some impurity phase from silicon substrate is also visible (marked by black arrows).

figures.

### section S5. Current distribution in multilayer thin films

The SOT-induced switching experiments involve devices comprised of metallic multilayer structure. It is important to consider the current distribution in different layers in order to evaluate the SOT contributed by SmB<sub>6</sub> and/or  $\beta$ -W. In our experiment, control samples of magnetic trilayer without SmB<sub>6</sub> were deposited on bare Si substrate side-by-side with the samples with SmB<sub>6</sub> underlayers. The sheet resistance of the trilayer MgO(1.5)/CFB(1)/W(0.8) were henceforth determined to be 1250  $\Omega/\square$  and the anomalous Hall resistance about 12  $\Omega$ . Two methods are employed to independently quantify the current distribution through the SmB<sub>6</sub> layer and the trilayer. Firstly the current distribution can be assessed using the two-conductor-in-parallel model, which apparently gives  $I_{SmB_6} R_{SmB_6} = I_{trilayer} R_{trilayer}$ . The result is shown as the dashed line in Fig. 3c of the

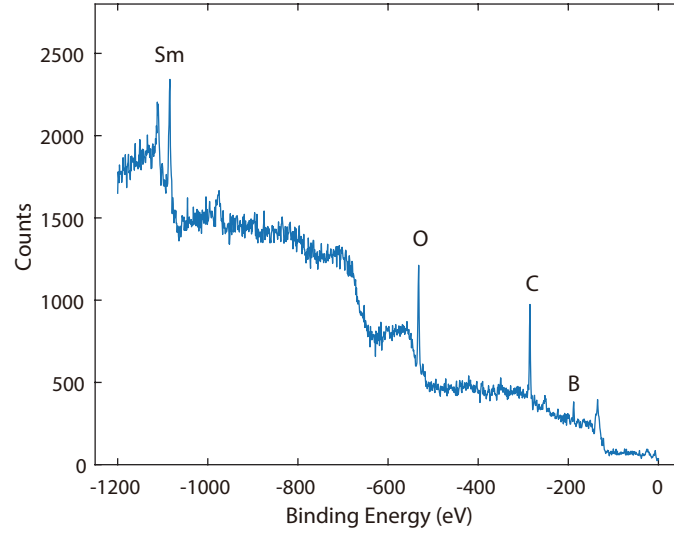

fig. S5. XPS spectrum of  $\text{SmB}_6$  thin films. XPS spectrum of 500 nm-thick  $\text{SmB}_6$  /  $\text{Si}(001)$  thin film. The sample was exposed to ambient atmosphere before transferred into vacuum and measured as is.

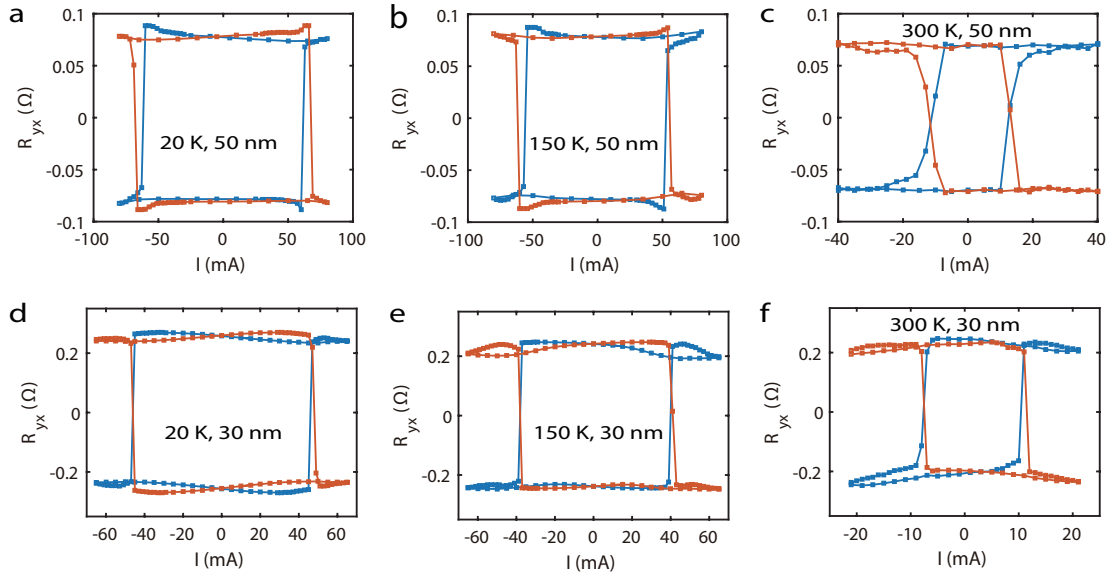

fig. S6. Additional SOT switching results of various temperatures.

The SOT-induced switching measurement of samples with  $\text{SmB}_6$  thickness as 50 nm (a, b, and c) and 30 nm (d, e, and f). External in-plane field, 200 Oe (blue curves) and -200 Oe (red curves) was applied along the current direction. Pulsed current of 12 ms width and amplitude plotted as the x axis was applied to induce switching, followed by a small probing DC current of 0.5 mA for measuring  $R_{yx}$ .

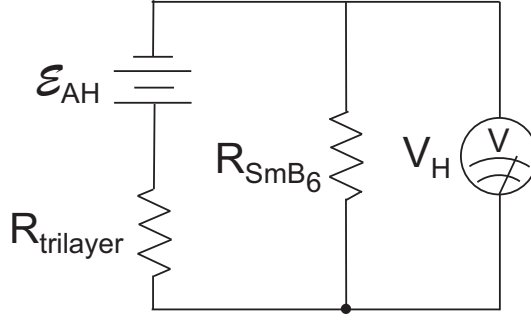

fig. S7. A schematic diagram of the anomalous Hall voltage measurement under the presence of a nonmagnetic shunting layer. The equivalent diagram of experimental Hall voltage measurement under the presence of a non-magnetic shunting layer SmB<sub>6</sub>.

manuscript. The resistivity of SmB<sub>6</sub> is taken as 600  $\mu\Omega cm$ , as determined from fitting the thickness-dependent resistance, as shown in Fig. 2. The other approach is through the shunting effect of anomalous Hall voltage caused by the non-magnetic SmB<sub>6</sub> layer. The principle is depicted in fig. S7, where  $\mathcal{E}_{AH}$  is the anomalous Hall voltage generated in the trilayer by  $I_{trilayer}$ , and  $V_H$  is the Hall voltage across the multilayer device that can be measured experimentally. Taken into account that the Hall resistance of the multilayer device is defined as  $R_H = V_H/I_{tot} = V_H/(I_{trilayer} + I_{SmB_6})$ , one arrives at  $I_{trilayer}/I_{tot} = (R_H/R_H^{trilayer})^{1/2}$ . The results for different SmB<sub>6</sub> are shown in Fig. 3c as discrete points. The results from two independent methods agree well. We conclude that the second approach is somewhat superior, as it is immune to possible deviation of the actual SmB<sub>6</sub> film thickness from the expected value, which would otherwise result experimental error in determining  $R_{SmB_6}$  in the first approach. Therefore, the result from the second method was used in further quantitative analyses regarding the SOT-induced switching, as described in the manuscript.

In fig. S8a we show the temperature dependence of the sheet resistance of pristine 50 nm-thick SmB<sub>6</sub> thin film and the magnetic trilayer. Both has little variation from room temperature down to cryogenic temperatures. As a result,  $I_{SmB_6}/I_{tot}$  has very small temperature variation of only about 1%, as shown in fig. S8b.

In order to compare the critical switching current density of  $\beta$ -W and SmB<sub>6</sub>, the current distribution between W and CFB also need to be resolved. Fig. S9 shows the sheet resistance of CFB(1)/W(t), where t varies as in a thickness wedge of the W layer. The thickness-dependent sheet resistance is fitted using  $R_{\square} = t_W^{-1}\rho_W \cdot t_{CFB}^{-1}\rho_{CFB}/(t_W^{-1}\rho_W + t_{CFB}^{-1}\rho_{CFB})$ . We obtain  $\rho_W$  as 265  $\mu\Omega cm$  and  $\rho_{CFB}$  as 114  $\mu\Omega cm$ , in good agreement with previously reported

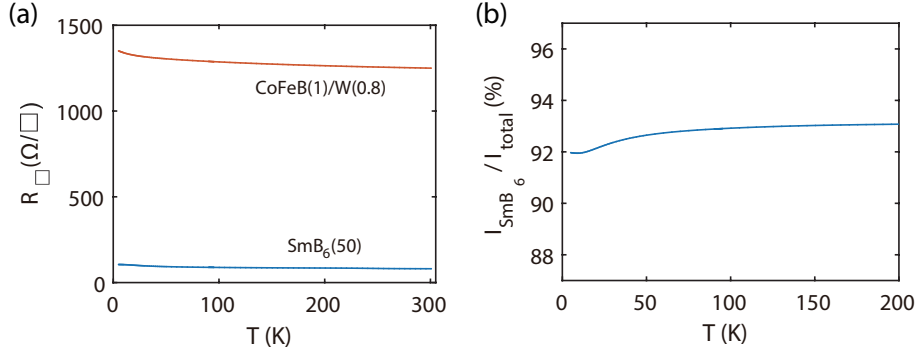

fig. S8. Temperature dependence of resistance of SmB<sub>6</sub> and CoFeB/W multilayers. **a**, temperature dependence of  $R_{\square}$  of 50 nm-thick SmB<sub>6</sub> film (blue) and MgO(1.5)/CoFeB(1)/W(0.8) trilayer. **b**,  $I_{SmB_6}/I_{tot}$  for MgO(1.5)/CoFeB(1)/W(0.8)/SmB<sub>6</sub>(50).

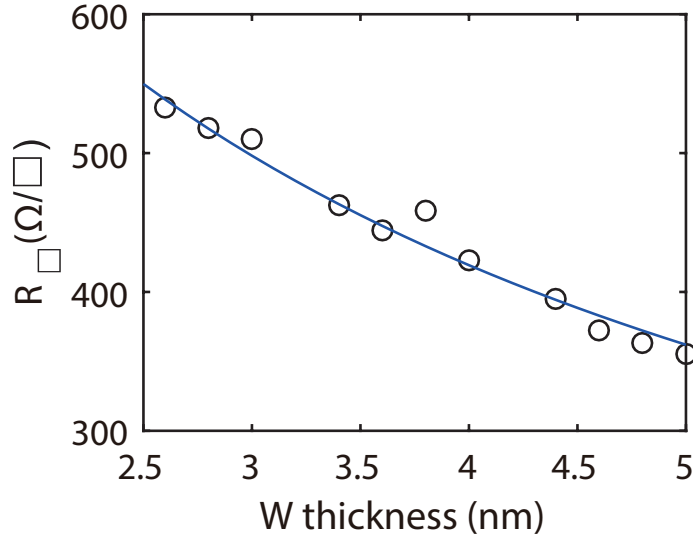

fig. S9. Sheet resistance of CoFeB/W multilayer as a function of W thicknesses. Sheet resistance of MgO(1.5)/CFB(1)/W(t) and fitting using two-conductor-in-parallel model (blue curve).

values [39, 40]. The high resistivity of W is usually taken as a signature of  $\beta$  phase. In our experiments, a protective 1 nm-thick Ta layer is capped on the magnetic trilayer to prevent it from oxidation. This capping layer is expected to oxidize in ambient pressure and do not contribute to electrical conductivity [39, 40]. We note that it will not affect the accuracy of our quantitative analysis even if the capping layer is not completely oxidized, in which case its potential contribution to the conductivity is either accounted for by the resistance of the trilayer when assessing  $I_{SmB_6}/I_{total}$ , or by  $\rho_{CFB}$  when assessing the current distribution in W.
